# Supplementary material for: Dielectric phase transition triggered by the order–disorder transformation of cyclopropylamine in a layered organic–inorganic halide perovskite
Source: Royal Society of Chemistry journal article supplement (doi:10.1039/c8tc03517b), 2018-01-01
Supplement: c8tc03517b1.pdf [file c8tc03517b1.pdf]

## Dielectric Phase Transition Triggered by the order-disorder Transformation of Cyclopropylamine in a layered Organic-Inorganic Halide Perovskite

Shiguo Han,<sup>ab</sup> Xitao Liu,<sup>a</sup> Jing Zhang,<sup>a</sup> Chengmin Ji,<sup>a</sup> Zhenyue Wu,<sup>ab</sup> Kewen Tao,<sup>a</sup> Yuyin Wang,<sup>ab</sup> Zhihua Sun<sup>\*a</sup> and Junhua Luo<sup>\*a</sup>

<sup>a</sup> State Key Laboratory of Structure Chemistry, Fujian Institute of Research on the Structure of Matter, Chinese Academy of Sciences, Fuzhou, 350002, P. R. China.

<sup>b</sup> University of Chinese Academy of Sciences, Beijing 100049, China.

\*Email - sunzhihua@fjirsm.ac.cn

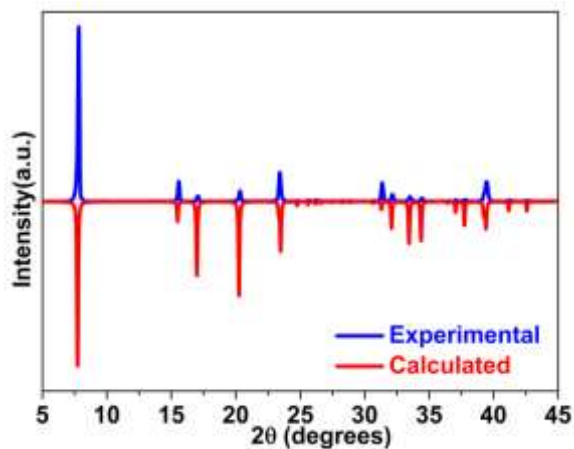

**Figure S1.** Experimental and calculated powder X-ray diffraction patterns of CPA at room temperature.

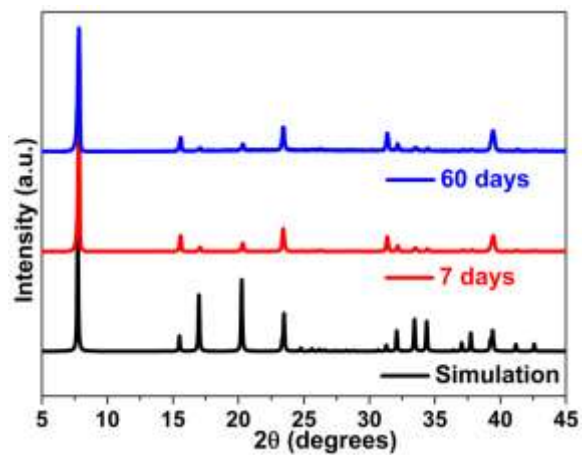

Figure S2. PXRD patterns of CPA recorded after 7/60 days at room temperature.

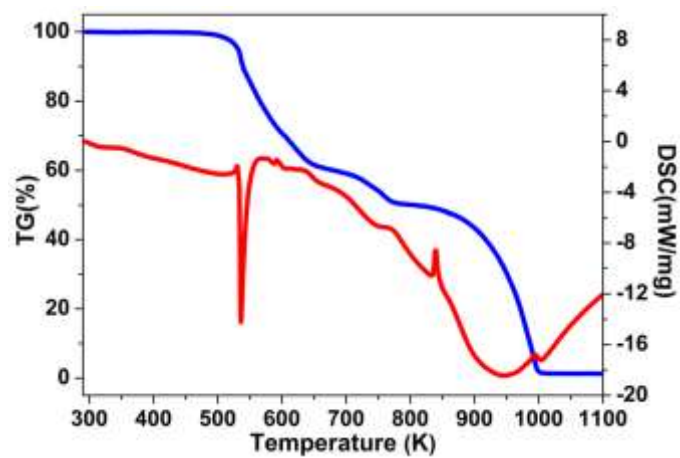

Figure S3. The TG curves of CPA with heating rate 10 K/min.

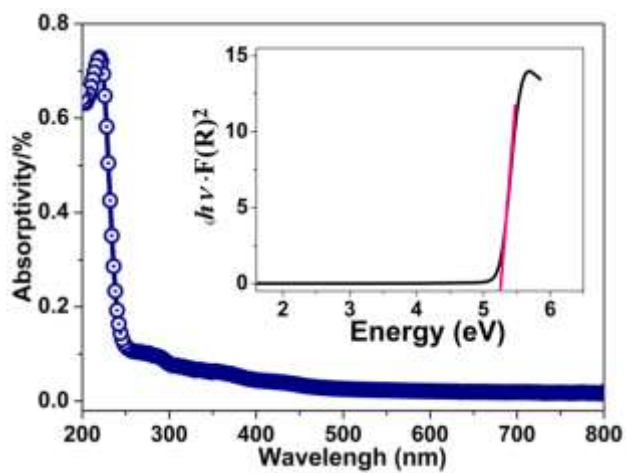

**Figure S4.** Ultraviolet-Vis diffuse reflectance spectrometry for CPA. Inset: Calculated band gap of CPA.

**Table S1.** Organic-inorganic hybrid phase transition compounds based on various cyclic organic amines.

| Cyclic amines      | Organic cation                                                                      | Compound formula                                                     | Transformation temperature                                                          | Ref.                                                    |       |      |
|--------------------|-------------------------------------------------------------------------------------|----------------------------------------------------------------------|-------------------------------------------------------------------------------------|---------------------------------------------------------|-------|------|
| Five-membered ring | 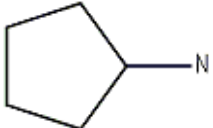 | $[\text{C}_5\text{H}_9\text{NH}_3][\text{CdCl}_3]$                   | 290 K                                                                               | [1]                                                     |       |      |
|                    |  | $[\text{C}_3\text{N}_2\text{H}_5]_3[\text{Sb}_2\text{Br}_{11}]$      | 125 K; 145 K; 353 K                                                                 | [2]                                                     |       |      |
|                    |                                                                                     | $[\text{C}_3\text{N}_2\text{H}_5]_3[\text{Sb}_2\text{I}_9]$          | 292 K; 325 K                                                                        | [3]                                                     |       |      |
|                    |                                                                                     | $[\text{C}_3\text{N}_2\text{H}_5]_3[\text{Bi}_2\text{I}_9]$          | 275 K; 325 K                                                                        |                                                         |       |      |
|                    |                                                                                     | $[\text{C}_3\text{N}_2\text{H}_5]_3[\text{Bi}_2\text{Br}_{11}]$      | 155 K; 355 K                                                                        | [4]                                                     |       |      |
| Six-membered ring  |  | $[\text{C}_5\text{H}_{10}\text{NH}_2]_2[\text{SbCl}_5]$              | 338 K                                                                               | [5]                                                     |       |      |
|                    |                                                                                     | $[\text{C}_5\text{H}_{10}\text{NH}_2]_2[\text{SbBr}_5]$              | 365 K                                                                               | [6]                                                     |       |      |
|                    |                                                                                     | $[\text{C}_5\text{H}_{10}\text{NH}_2]_2[\text{BiCl}_5]$              | 342 K                                                                               |                                                         |       |      |
|                    |                                                                                     | $[\text{C}_5\text{H}_{10}\text{NH}_2]_2[\text{BiBr}_5]$              | 362 K                                                                               |                                                         |       |      |
|                    |  | $[\text{C}_6\text{H}_{11}\text{NH}_3]_2\text{PbBr}_4$                | 360 K                                                                               | [7]                                                     |       |      |
|                    |                                                                                     | $[\text{C}_6\text{H}_{13}\text{NH}]_2[\text{ZnBr}_4]$                | 345 K                                                                               | [8]                                                     |       |      |
|                    |                                                                                     | $[\text{C}_6\text{H}_{14}\text{N}][\text{FeBr}_4]$                   | 340 K                                                                               | [9]                                                     |       |      |
|                    |                                                                                     | $[\text{C}_6\text{H}_{14}\text{N}](18\text{-crown-6})[\text{ClO}_4]$ | 250 K                                                                               | [10]                                                    |       |      |
|                    |                                                                                     | Seven-membered                                                       |  | $[\text{C}_6\text{H}_{11}\text{NH}_3]_2[\text{PbBr}_3]$ | 338 K | [11] |

|                     |                                                                                   |                                                         |       |            |
|---------------------|-----------------------------------------------------------------------------------|---------------------------------------------------------|-------|------------|
| ring                |                                                                                   | $[\text{C}_6\text{H}_{11}\text{NH}_3]_2[\text{SbCl}_5]$ | 335 K | [12]       |
| Three-membered ring | 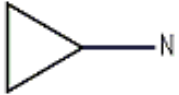 | $[\text{C}_3\text{H}_5\text{NH}_3]_2[\text{CdCl}_4]$    | 273 K | <b>CPA</b> |

- [1] Y. Zhang, H. Y. Ye, W. Zhang, R. G. Xiong, *Inorg. Chem. Front*, 2014, **1**, 118
- [2] A. Piecha, A. Pietraszko, G. Bator and R. Jakubas, *J. Solid. State Chem*, 2008, **181**, 1155.
- [3] M. Wectawik, A. Gagor, R. Jakubas, A. P. Bisiorek, W. Medycki, J. Baran, P. Zielinski and M. Gatazka, *Inorg. Chem. Front*, 2016, **3**, 1306.
- [4] A. Piecha, A. Bialonska and R. Jakubas, *J. Phys Condens Mat*, 2008, **20**, 325224.
- [5] S. G. Han, J. Zhang, Z. H. Sun, C. M. Ji, W. C. Zhang, Y. Y. Wang, K. W. Tao, B. Teng and J. H. Luo, *Inorg. Chem.* 2017, **56**, 13078.
- [6] B. B. Bolek, J. Zaleski, G. Bator, R. Jakubas, *J. Phys Chem Solids*, 2000, **61**, 1249.
- [7] Z. H. Sun, X. T. Liu, T. Khan, C. M. Ji, M. A. Asghar, S. G. Zhao, L. N. Li, M. C. Hong and J. H. Luo, *Angew. Chem. Int. Ed.* 2016, **55**, 6545.
- [8] T. Khan, M. A. Asghar, Z. H. Sun, A. Zeb, L. N. li, S. J. Liu, S. G. Zhao, C. M. Ji and J. H. Luo, *Chem. Asian J.* 2016, **11**, 2876.
- [9] S. G. Han, J. Zhang, B. Teng, C. M. Ji, W. C. Zhang, Z. H. Sun and J. H. Luo, *J. Mater. Chem. C*, 2017, **5**, 8509.
- [10] T. Khan, M. A. Asghar, Z. H. Sun, A. Zeb, C. M. Ji and J. H. Luo, *J. Mater. Chem. C*, 2017, **5**, 2865.
- [11] J. Zhang, X. T. Liu, X. F. Li, S. G. Han, K. W. Tao, Y. Y. Wang, C. M. Ji, Z. H. Sun and J. H. Luo, *Chem. Asian J.* 2018, **13**, 982.
- [12] J. Zhang, S. G. Han, X. T. Liu, Z. Y. Wu, C. M. Ji, Z. H. Sun and J. H. Luo, *Chem. Commun*, 2018, **54**, 5614.

**Table S2. Crystal data and structure refinement for compound CPA.**

|                         |                                                  |                                                  |
|-------------------------|--------------------------------------------------|--------------------------------------------------|
| Empirical formula       | $\text{C}_6\text{H}_{16}\text{N}_2\text{CdCl}_4$ | $\text{C}_6\text{H}_{16}\text{N}_2\text{CdCl}_4$ |
| Temperature             | 100 K                                            | 280 K                                            |
| Formula weight          | 370.41                                           | 370.41                                           |
| Crystallographic system | monoclinic                                       | orthorhombic                                     |
| Space group             | $P2_1/c$<br>$a = 11.9475(7)$                     | $Cmca$<br>$a = 7.5746(7)$                        |

|                                      |                                  |                                   |
|--------------------------------------|----------------------------------|-----------------------------------|
|                                      | $b = 7.2805(4)$                  | $b = 22.852(2)$                   |
|                                      | $c = 7.6597(5)$                  | $c = 7.5728(6)$                   |
|                                      | $\beta = 108.539(2)$             | $\alpha = \beta = \gamma = 90.00$ |
| Unit cell dimensions                 | $V = 631.69(7)$                  | $V = 1310.8(2)$                   |
| Z, Calculated density                | 2, 1.9471 g/cm <sup>3</sup>      | 4, 1.877 g/cm <sup>3</sup>        |
| $F(000)$                             | 364.0                            | 728.0                             |
| Theta range for data collection      | 5.596-55.19°                     | 6.454-55.072°                     |
|                                      | $-15 \leq h \leq 14$             | $-9 \leq h \leq 9$                |
| Limiting indices                     | $-9 \leq k \leq 9$               | $-29 \leq k \leq 27$              |
|                                      | $-9 \leq l \leq 9$               | $-9 \leq l \leq 9$                |
| Reflections collected / unique       | 7996/1446 [ $R_{int} = 0.0457$ ] | 3665/808 [ $R_{int} = 0.0366$ ]   |
| Completeness                         | 98.9%                            | 99.2%                             |
| Data / restraints / parameters       | 1446/0/63                        | 808/36/45                         |
| Goodness-of-fit                      | 1.137                            | 1.099                             |
| Final R indices [ $I > 2\sigma(I)$ ] | $R_1 = 0.0370$                   | $R_1 = 0.0635$                    |

**Table S3. N-H...Cl Hydrogen bonds of CPA at LTP.**

| D-H...A                    | d(D-H) | d(H...A) | < DHA  | d(D..A) |
|----------------------------|--------|----------|--------|---------|
| N1-H1A...Cl2 <sup>#1</sup> | 0.910  | 2.309    | 168.68 | 3.207   |
| N1-H1B...Cl1 <sup>#2</sup> | 0.910  | 2.462    | 146.05 | 3.256   |
| N1-H1B...Cl2 <sup>#3</sup> | 0.910  | 2.757    | 125.15 | 3.365   |
| N1-H1C...Cl1               | 0.910  | 2.292    | 176.73 | 3.201   |

Symmetry transformations used to generate equivalent atoms:

<sup>#1</sup> -X+1, Y+1/2, -Z+3/2    <sup>#2</sup> X, -Y+1/2, Z-1/2    <sup>#3</sup> -X+1, -Y+1, -Z+1

**Table S4. N-H...Cl Hydrogen bonds of CPA at HTP.**

| D-H...A                    | d(D-H) | d(H...A) | < DHA  | d(D..A) |
|----------------------------|--------|----------|--------|---------|
| N1-H1A...Cl1 <sup>#1</sup> | 0.890  | 2.470    | 171.31 | 3.353   |
| N1-H1B...Cl1 <sup>#2</sup> | 0.890  | 2.874    | 128.17 | 3.495   |
| N1-H1C...Cl1 <sup>#3</sup> | 0.890  | 2.877    | 127.89 | 3.495   |
| N1-H1C...Cl2 <sup>#4</sup> | 0.890  | 2.568    | 140.49 | 3.303   |

Symmetry transformations used to generate equivalent atoms:

<sup>#1</sup> X+1/2, Y, -Z+3/2    <sup>#2</sup> -X+3/2, -Y+1, Z-1/2    <sup>#3</sup> -X+2, -Y+1, -Z+1    <sup>#4</sup> X+1/2, Y, -Z+1/2

**Table S5. Cl-Cd-Cl Bond angles of compound CPA at LTP and HTP.**

| LTP                 |       |                     |       |
|---------------------|-------|---------------------|-------|
| Bond Angle          | (°)   | Bond Angle          | (°)   |
| Cl(11)-Cd(1)-Cl(1)  | 180.0 | Cl(11)-Cd(1)-Cl(2)  | 92.15 |
| Cl(1)-Cd(1)-Cl(22)  | 86.98 | Cl(22)-Cd(1)-Cl(21) | 91.63 |
| Cl(1)-Cd(1)-Cl(21)  | 92.15 | Cl(23)-Cd(1)-Cl(21) | 88.37 |
| Cl(11)-Cd(1)-Cl(23) | 86.98 | Cl(22)-Cd(1)-Cl(2)  | 88.37 |
| Cl(11)-Cd(1)-Cl(21) | 87.85 | Cl(23)-Cd(1)-Cl(22) | 180.0 |
| Cl(1)-Cd(1)-Cl(23)  | 93.02 | Cl(23)-Cd(1)-Cl(2)  | 91.63 |
| Cl(1)-Cd(1)-Cl(2)   | 87.85 | Cl(21)-Cd(1)-Cl(2)  | 180.0 |
| Cl(11)-Cd(1)-Cl(22) | 93.02 |                     |       |

  

| HTP                 |       |                     |       |
|---------------------|-------|---------------------|-------|
| Bond Angle          | (°)   | Bond Angle          | (°)   |
| Cl(11)-Cd(1)-Cl(12) | 90.50 | Cl(21)-Cd(1)-Cl(12) | 89.85 |
| Cl(13)-Cd(1)-Cl(1)  | 90.50 | Cl(21)-Cd(1)-Cl(13) | 90.15 |
| Cl(12)-Cd(1)-Cl(1)  | 89.50 | Cl(2)-Cd(1)-Cl(12)  | 90.15 |
| Cl(12)-Cd(1)-Cl(13) | 180.0 | Cl(2)-Cd(1)-Cl(11)  | 89.85 |
| Cl(11)-Cd(1)-Cl(1)  | 180.0 | Cl(2)-Cd(1)-Cl(1)   | 90.15 |
| Cl(11)-Cd(1)-Cl(13) | 89.50 | Cl(21)-Cd(1)-Cl(1)  | 89.85 |
| Cl(2)-Cd(1)-Cl(13)  | 89.85 | Cl(2)-Cd(1)-Cl(21)  | 180.0 |
| Cl(21)-Cd(1)-Cl(11) | 90.15 |                     |       |

**Table S6. Cd-Cl Bond lengths of compound CPA at LTP and HTP.**

| LTP          |            |              |            |
|--------------|------------|--------------|------------|
| Bond         | (Å)        | Bond         | (Å)        |
| Cd(1)-Cl(11) | 2.5429(14) | Cd(1)-Cl(22) | 2.6878(14) |
| Cd(1)-Cl(1)  | 2.5429(14) | Cd(1)-Cl(23) | 2.6878(14) |
| Cd(1)-Cl(2)  | 2.7036(14) | Cl(2)-Cd(14) | 2.6878(14) |
| Cd(1)-Cl(21) | 2.7036(14) |              |            |

  

| HTP          |           |              |           |
|--------------|-----------|--------------|-----------|
| Bond         | (Å)       | Bond         | (Å)       |
| Cd(1)-Cl(1)  | 2.6899(4) | Cd(1)-Cl(2)  | 2.491(4)  |
| Cd(1)-Cl(11) | 2.6899(4) | Cd(1)-Cl(23) | 2.491(4)  |
| Cd(1)-Cl(12) | 2.6899(4) | Cl(1)-Cd(14) | 2.6899(4) |
| Cd(1)-Cl(13) | 2.6899(4) |              |           |
